# Supplementary material for: Targeting IL-6 trans-signalling by sgp130Fc attenuates severity in SARS-CoV-2 -infected mice and reduces endotheliopathy
Source: PubMed Central journal article supplement — eBioMedicine. 2024 Apr 26;103:105132. doi: 10.1016/j.ebiom.2024.105132 (PMC11061249; doi:10.1016/j.ebiom.2024.105132), 2024-04-26
Supplement: mmc1.pdf [file mmc1.pdf]

## Supplementary material

1. **Supplementary Table S1.** qPCR primers for detection of mouse (m) and human (h) genes.
2. **Supplementary Table S2.** Clinical sickness parameters
3. **Supplementary Figure 1.** Percentage of body weight change in SARS-CoV-2 K18-hACE2 infected mice
4. **Supplementary Figure 2.** Serum cytokines and chemokines levels from SARS-CoV-2-infected mice.
5. **Supplementary Figure 3.** Treg related factors (Foxp3 and Il-10) and Th17 related factors (Roryt and Il17) in infected mice.
6. **Supplementary Figure 4.** JAK1/STAT3 signalling on human primary endothelial cells and fibroblasts.
7. **Supplementary Figure 5.** sgp130Fc blocks IL-6:sIL-6R complex stimulation in a dose dependent manner.
8. **Supplementary Figure 6.** Cell proliferation/viability after sgp130Fc treatment.
9. **Supplementary Figure 7.** ICAM-1 and MCP-1 secretion from cultured human endothelial cells and lung fibroblasts.
10. **Supplementary Figure 8.** Western blot densitometric analyses of gp130.

**Table S1.** qPCR primers for detection of mouse (m) and human (h) genes.

| Gene         | Sequence (5' – 3')                                       | Gene          | Sequence (5' – 3')                                     |
|--------------|----------------------------------------------------------|---------------|--------------------------------------------------------|
| mCyclophilin | Fw: GTCTCCTTCGAGCTGTTTGC<br>Rv: CGTGTAAGTCACCACCCTG      | mhRplo        | Fw: AACATCTCCCCCTTCTCCTT<br>Rv: GAAGGCCTTGACCTTTTCAG   |
| mIl6r        | Fw: ACGAAGGCTGTGCTTTGC<br>Rv: TTCGTTGTGGCTGGACTTGC       | mIl6st        | Fw: AAGGATTTGGCTAGCGCAAGC<br>Rv: CCACACGATGTAGCTGGCATT |
| mOsm         | Fw: ACGGCTTCTAAGAACACTGC<br>Rv: GATATAGGGCTCCAAGAGTG     | mOsmr         | Fw: TCTTGAGGAGCCTTTACCAT<br>Rv: TTCCAGGAACTCCAGTTGC    |
| mLif         | Fw: CGAGACCACGCTCCAGTATAT<br>Rv: TTTCCAGTGCAGAACCAGCAG   | mLifr         | Fw: CGATGCATGCAAACGGTCTGA<br>Rv: GACTTCGTGATCACCAGGTGA |
| mIl11        | Fw: ACTAGCTGCACAGATGAGAG<br>Rv: GCTCCAGAGTCTTTAGGGAA     | mIl11r        | Fw: CCTGGAGACATCTGTCCTCA<br>Rv: CCTGAGCAGCTGCTGCTCAT   |
| mSocs3       | Fw: AAGGCCGGAGATTTCGCT<br>Rv: AACTTGCTGTGGGTGACCAT       | mSaa1         | Fw: TTGTTACAGAGGCTTTC<br>Rv: TGAGCAGCATCATAGTTCC       |
| mLrg1        | Fw: TAGAGGAGCAGCTATGGTCTCT<br>Rv: TACCCTCAGCCGACTGCAGTAT | mTnf $\alpha$ | Fw: AGCCACGTCGTAGCAAACC<br>Rv: GAGGAGCACGTAGTCGGGGC    |
| mIl1 $\beta$ | Fw: CTTGGGATCCACACTCTCCAG<br>Rv: AAATACCTGTGGCCTTGGGC    | mIfny         | Fw: ACAGCAAGCGCAAAAAGGA<br>Rv: TGGTGGACCACTCGGATGA     |
| mIL10        | Fw: GCTCTTACTGACTGGCATG<br>Rv: CCTGAGGGTCTTCAGCTTC       | mRORgt        | Fw: AAGGCAAATACGGTGGTGTG<br>Rv: GAAAAGGGTGAAGGAGTCGC   |
| mSTAT3       | Fw: GGAGCAGCATCTTCAGGATGT<br>Rv: TCTGTCTGGTCACAGACTGGT   | mFOXP3        | Fw: GAGAAGACAGACCCATGCTGT<br>Rv: AGAGGAGCTGCTGAGATGTGA |
| mIL17        | Fw: TCCAGGGAGAGCTTCATCTG<br>Rv: GAAGTCCTTGGCCTCAGTGT     |               |                                                        |
| hCyclophilin | Fw: AGACAAGGTCCCAAAGACAGC<br>Rv: CAGTGCCATTATGGCGTGTGA   | hIl6          | Fw: TGACCCAACCACAAATGC<br>Rv: CTGGCTCTGAAACAAAGGAT     |
| hgp130       | Fw: TTGACGTTGCAGACTTGGCT<br>Rv: AACTGGAGATTCAGGACTGA     | hCcl2         | Fw: GCAAGTGTCCCAAAGAAGCT<br>Rv: AGCTTCTTTGGGACACTTGC   |
| hCxcl2       | Fw: GCAGAAAGCTTGTCTCAACCC<br>Rv: GGCAGAAAGCTTGTCTCAACCC  | hIcam         | Fw: AGGATGGCACTTTCCCACTG<br>Rv: GGAGAGCACATTCACGGTCA   |

**Table S2.** Clinical sickness parameters

| <b>Clinical parameters</b> |                 | <b>Degree</b>          |
|----------------------------|-----------------|------------------------|
| <b>Breathing</b>           | Dyspnoea        | No                     |
|                            |                 | Yes                    |
| <b>Appearance</b>          | Piloerection    | No                     |
|                            |                 | Yes                    |
|                            | Hunched posture | No                     |
|                            |                 | Yes                    |
|                            | Eye closure     | Normal                 |
|                            |                 | Squinted/Closed        |
| <b>Behavior</b>            | Spontaneous     | Alert                  |
|                            |                 | Slow moving/Lethargy   |
|                            | Provoked        | Response to stimuli    |
|                            |                 | No response to stimuli |

**Fig. S1**

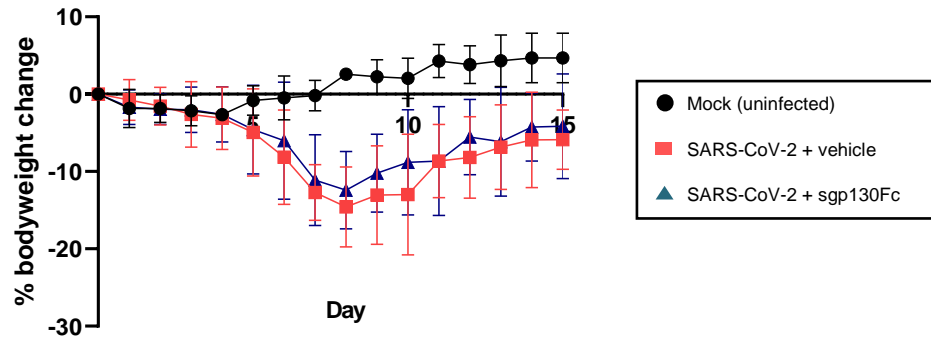

**Percentage of body weight change in SARS-CoV-2 K18-hACE2 infected mice.** Data are shown as mean and 95% confidence intervals (CI). Data are combined from two independent experiments.

**Fig. S2**

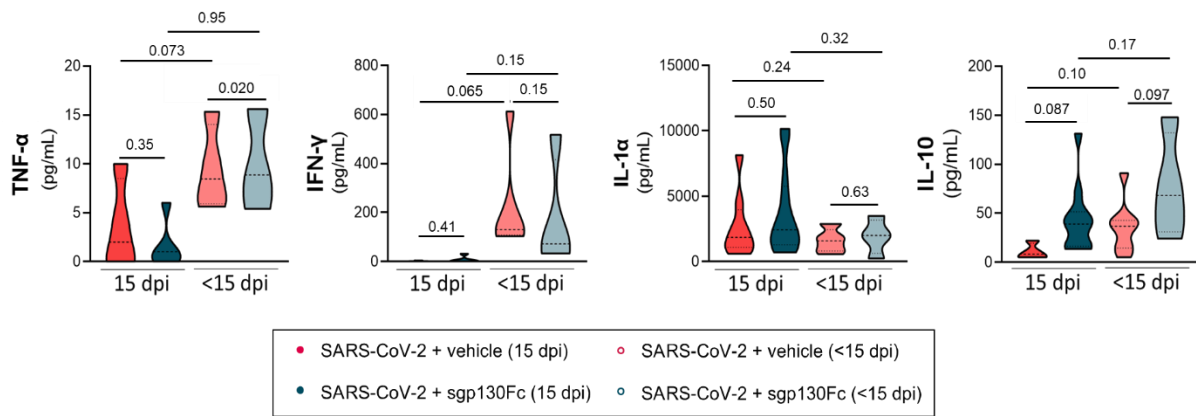

**Serum cytokines and chemokines levels from SARS-CoV-2-infected mice.** Serum from untreated and sgp130Fc-treated infected animals were analysed by multiplex analysis. Data are combined from two independent experiments. dpi: day post infection. < 15 dpi: dead/ethanized mice before the end of the experiment. 15 dpi: surviving mice at the end of experiment. All graphs show mean and 95% CI. Statistics were calculated by Kruskal-Wallis test with Mann-Whitney U-test. p values are indicated in the graphs.

**Fig. S3**

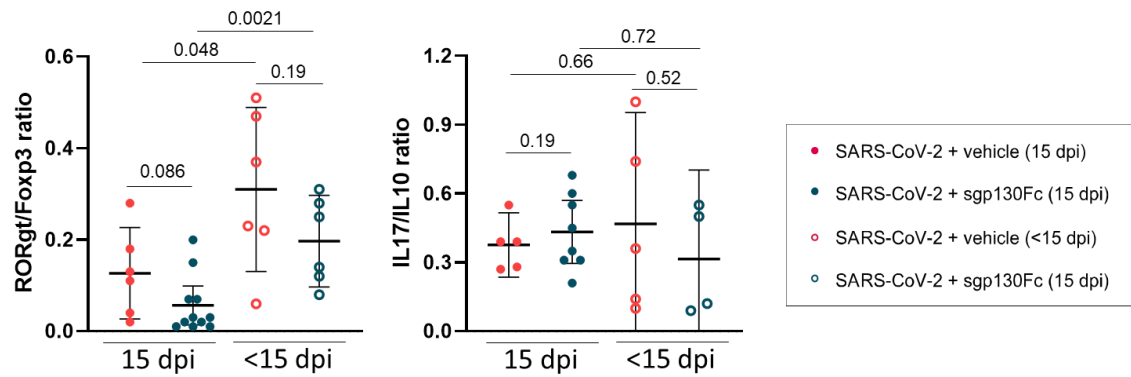

**Treg related factors (*Foxp3* and *Il-10*) and Th17 related factors (*Roryt* and *Il17*) in infected mice.** RORgt/Foxp3 and IL17/IL-10 mRNA ratios measured in lung homogenates by qPCR. Data are combined from two independent experiments. dpi: day post infection. < 15 dpi: dead/euthanized mice before the end of the experiment. 15 dpi: surviving mice at the end of experiment. All graphs show mean and 95% CI. Statistics were calculated by Kruskal-Wallis test with Mann-Whitney U-test. *p* values are indicated in the graphs.

**FIG. S4**

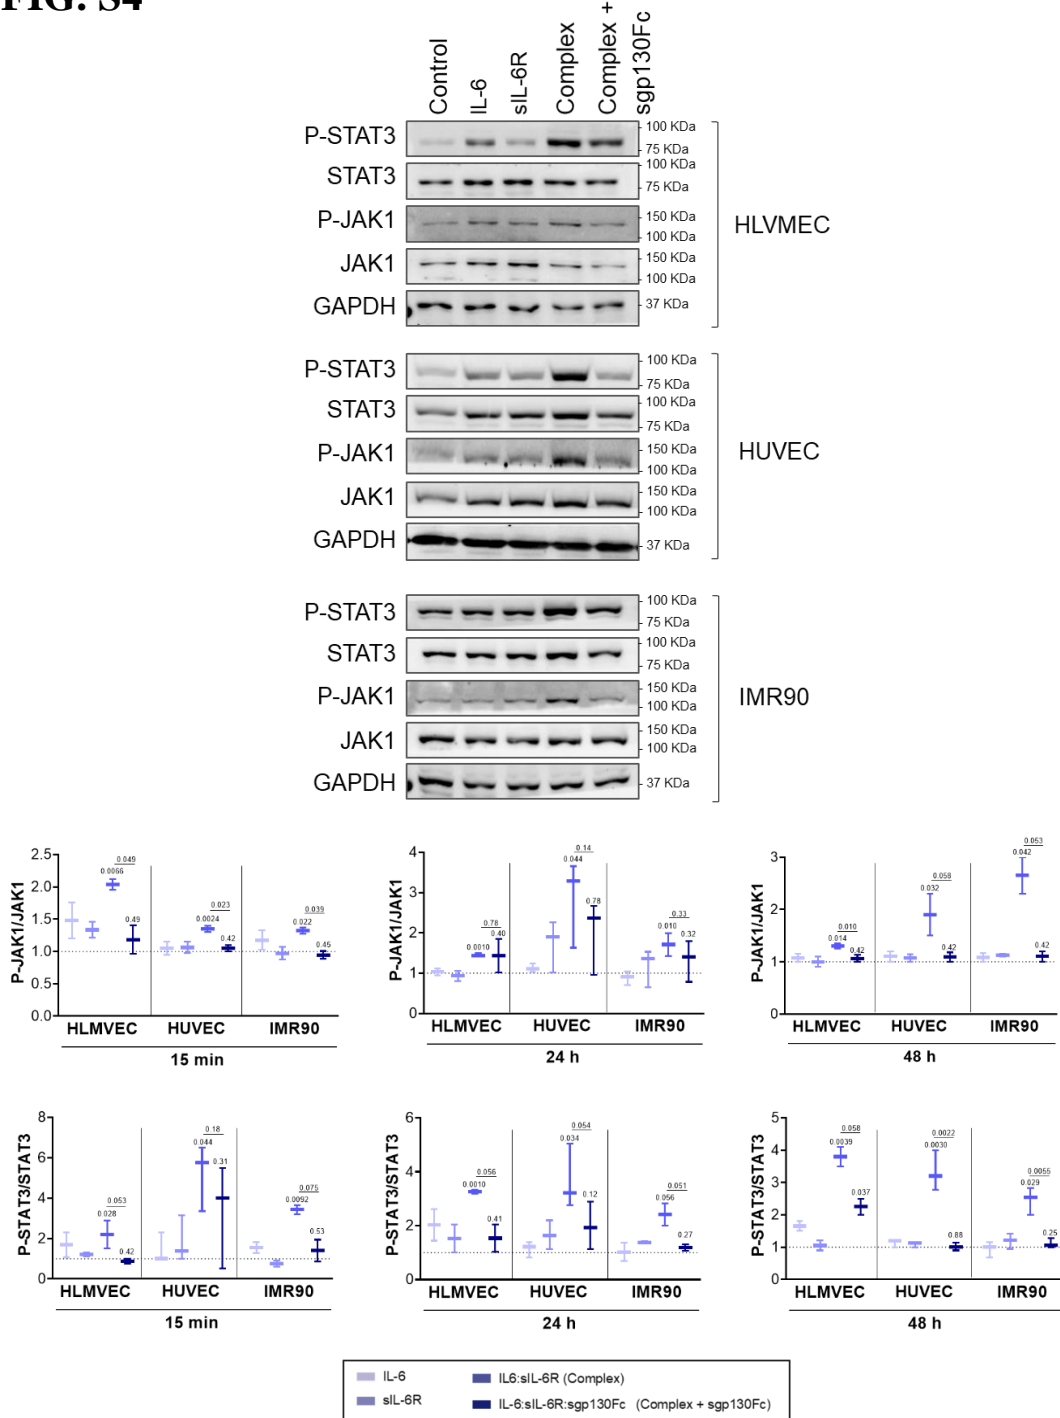

**JAK1/STAT3 signalling on human primary endothelial cells and fibroblasts.** a) Representative Western blots P(Tyr705)-STAT3, STAT3, P(Tr1034/1035)-JAK1 and JAK1 from cell lysates after 48 h of treatment. b) Western blot densitometric analyses of P(Tyr705)-STAT3/STAT3 and P(Tyr1034/1035)-JAK1/JAK1 at 15 min, 24 h (presented in Fig 7a) and 48 h. Human lung microvascular cells (HLMVEC), human umbilical vein endothelial cells (HUVEC) and primary lung fibroblast (IMR-90) were treated with vehicle, IL-6 (20 ng/mL), IL-6R (20 ng/mL) or IL-6:sIL-6R complex (20 ng/mL) in the presence or absence of sgp130Fc (300 ng/mL). Data are combined from 4-3 individual experiments. Control is set to 1 for each experiment and data presented as fold-change *vs* control. Complex: IL-6:sIL-6R complex. Complex + sgp130: IL-6:sIL-6R:sgp130Fc complex. All graphs show mean and 95 % CI. Statistics were calculated by Kruskal-Wallis test with Mann-Whitney U-test. *p* values *vs* vehicle-treated control (above) and *vs* complex (bar) are indicated in the graphs.

**Fig. S5**

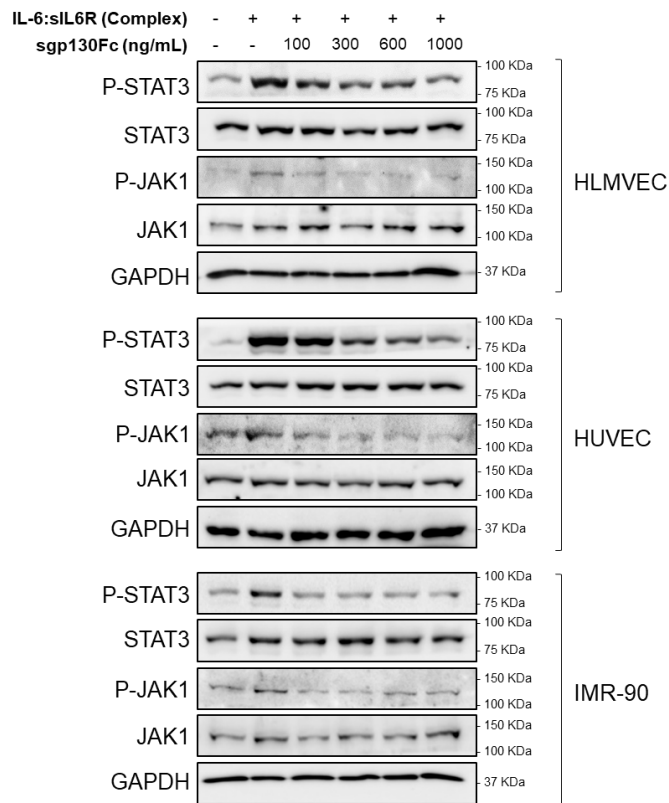

**sgp130Fc blocks IL-6:sIL-6R complex stimulation in a dose dependent manner.** Representative Western blots of P(Tyr705)-STAT3, STAT3, P(Tr1034/1035)-JAK1 and JAK1 in Human lung microvascular endothelial cells (HLMVEC), human umbilical vein endothelial cells (HUVEC) and human lung fibroblast (IMR-90) treated during 24 h with IL-6:sIL-6R complex in the presence or absence of different doses of sgp130Fc (100 ng/mL, 300 ng/mL, 600 ng/mL, 1000 ng/mL).



**Fig. S6**

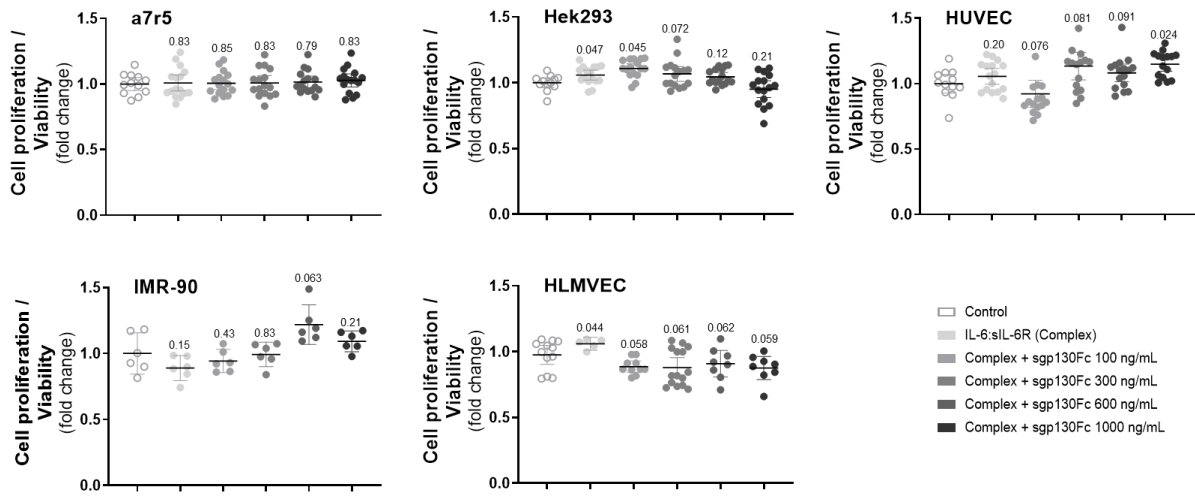

**Cell proliferation/viability after sgp130Fc treatment.** Human lung microvascular endothelial cells (HLMVEC), human umbilical vein endothelial cells (HUVEC), human lung fibroblast (IMR-90), aortic thoracic smooth muscle cells (A7r5) and human embryonic kidney cells (HEK293) were seeded in 96-well plates at a density of 5000 or 10,000 cells/well (for cell lines or primary cell culture, respectively) and serum starved for 24 h. Then, cells were treated with vehicle (control) and IL-6:sIL-6R (Complex, 20 ng/mL) in the presence or absence of different doses of sgp130Fc (100 ng/mL, 300 ng/mL, 600 ng/mL, 1000ng/mL) for 24 h. Proliferation/viability was evaluated using AlamarBlue reagent (Biosource International) and determined in a Spectrophotometer (Thermo Scientific Multiskan Go Microplate) up to 72 h. Results were expressed as a percentage referred to vehicle-treated controls. Data are combined from 6-16 independent experiments. Control is set to 1 for each experiment and data presented as fold-change vs control. All graphs show mean and 95% CI. Statistics were calculated by one way ANOVA.

**Fig S7**

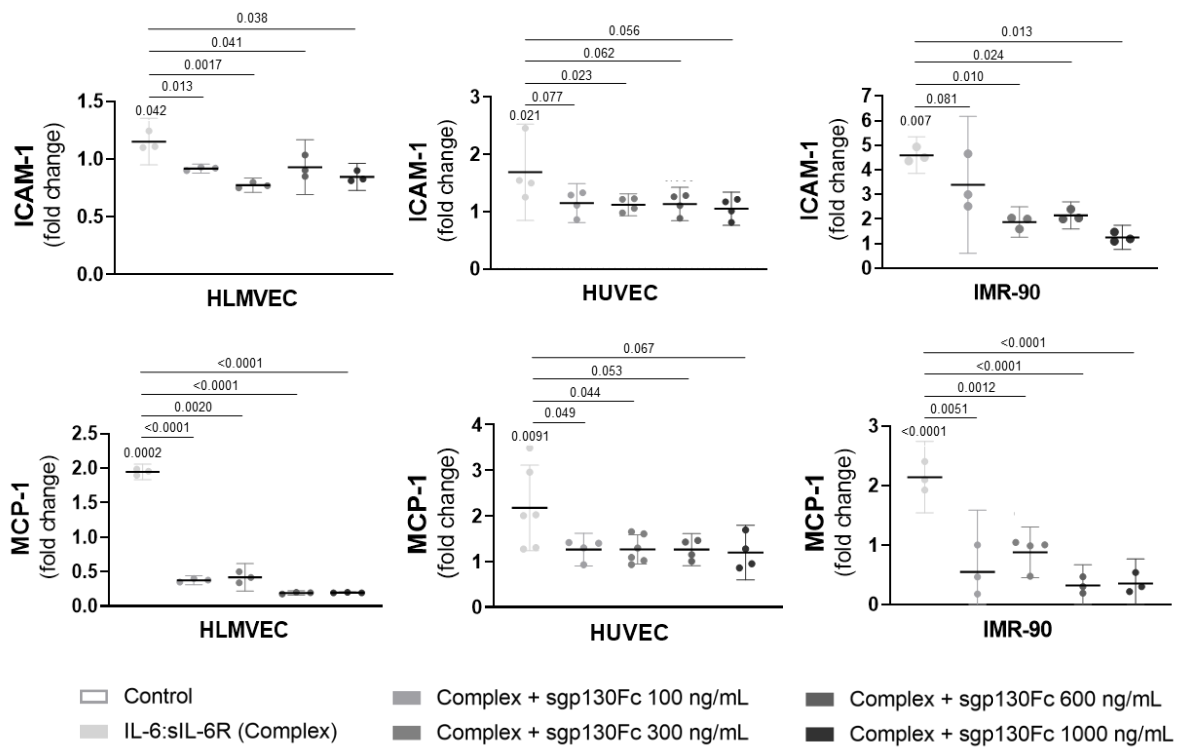

**ICAM-1 and MCP-1 secretion from cultured human endothelial cells and lung fibroblasts.** Human lung microvascular endothelial cells (HLMVEC), human umbilical vein endothelial cells (HUVEC) and human lung fibroblast (IMR-90) were treated with vehicle (control), IL-6 (20 ng/mL), IL-6R (20 ng/mL) or IL-6:sIL-6R (Complex, 20 ng/mL) in the presence or absence of sgp130Fc (100 ng/mL, 300 ng/mL, 600 ng/mL, 1000 ng/mL). ICAM-1/CD54 and CCL2/MCP1 levels by ELISA after 12 h and 24 h of treatment respectively. Data are combined from 3-4 independent experiments. Control is set to 1 for each experiment. All graphs show mean and 95% CI. Statistics were calculated by Kruskal Wallis test and with Mann-Whitney U-test. *p* values are indicated in the graphs.

**Fig. S8**

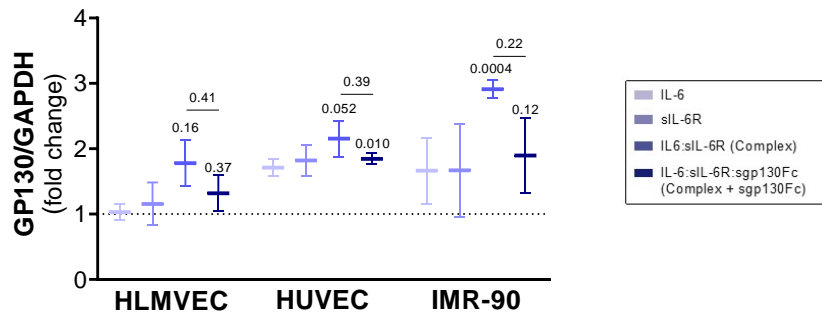

**Western blot densitometric analyses of gp130.** Human lung microvascular cells (HLMVEC), human umbilical vein endothelial cells (HUVEC) and primary lung fibroblast (IMR-90) were treated with vehicle, IL-6 (20 ng/mL), IL-6R (20 ng/mL) or IL-6:sIL-6R complex (20 ng/mL) in the presence or absence of sgp130Fc (300 ng/mL) for 24 h. Data are combined from 3 individual experiments. Control is set to 1 for each experiment and data presented as fold-change vs control (mean and 95% CI). Complex: IL-6:sIL-6R. Complex + sgp130: IL-6:sIL-6R:sgp130Fc. Graph shows mean and 95% CI. Statistics were calculated by Kruskal-Wallis test with Mann-Whitney U-test. *p* values vs vehicle-treated control (above) and versus complex (bar) are indicated in the graphs.
