# Supplementary figures and images for: Targeting IL-6 trans-signalling by sgp130Fc attenuates severity in SARS-CoV-2 -infected mice and reduces endotheliopathy
Source: PubMed Central journal article supplement — eBioMedicine. 2024 Apr 26;103:105132. doi: 10.1016/j.ebiom.2024.105132 (PMC11061249; doi:10.1016/j.ebiom.2024.105132), 2024-04-26

**Fig. 7a**

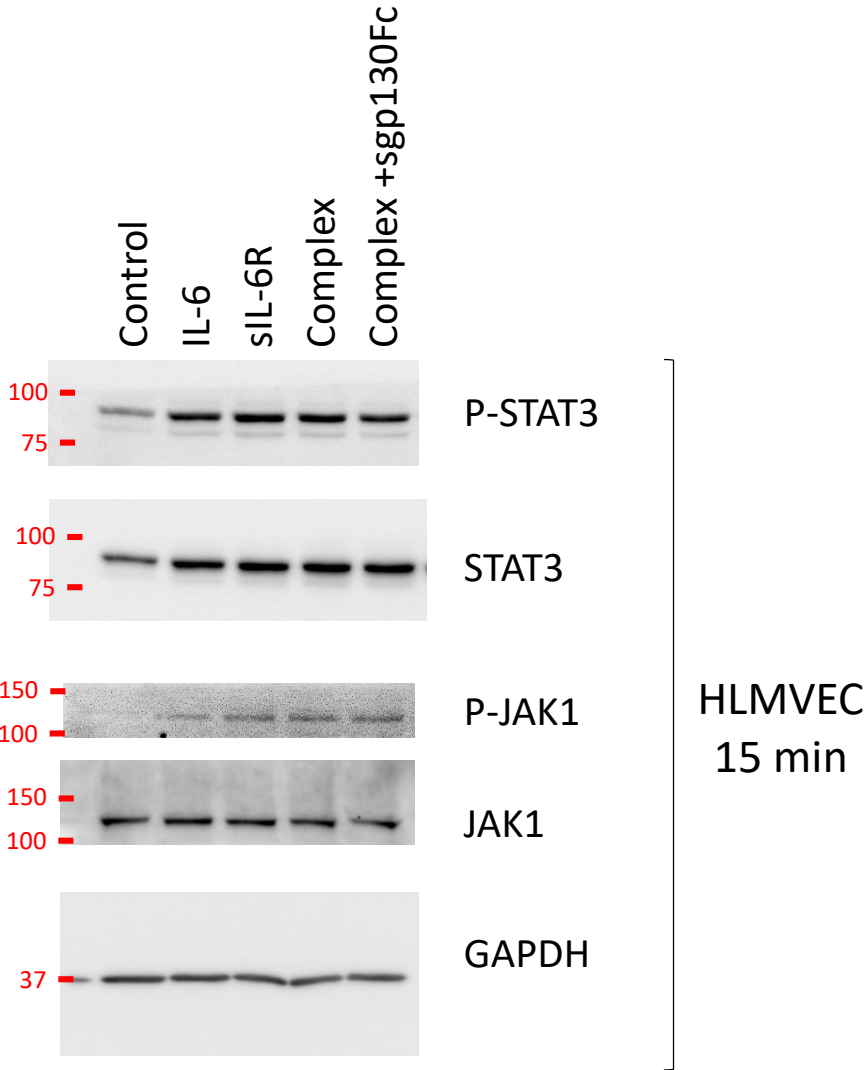

**Fig. 7a**

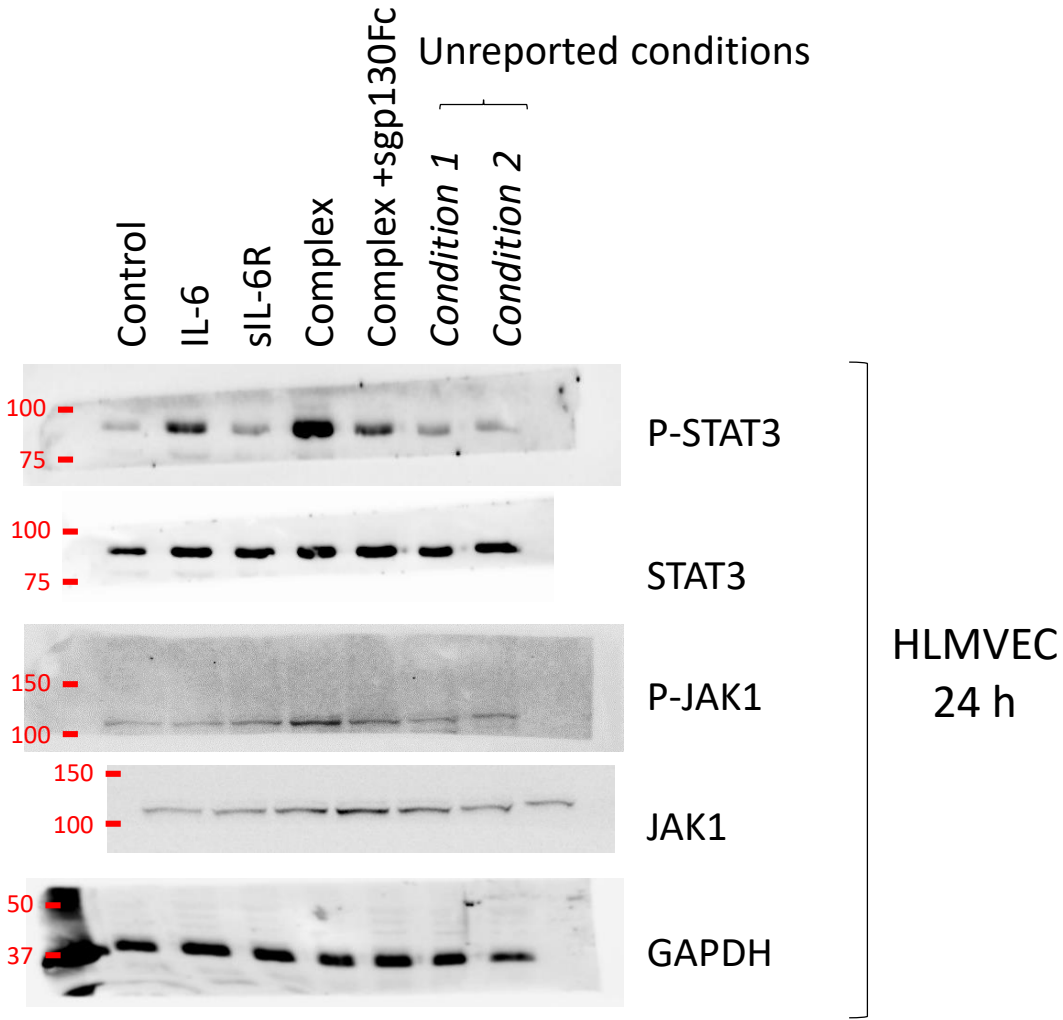

**Fig. 7a**

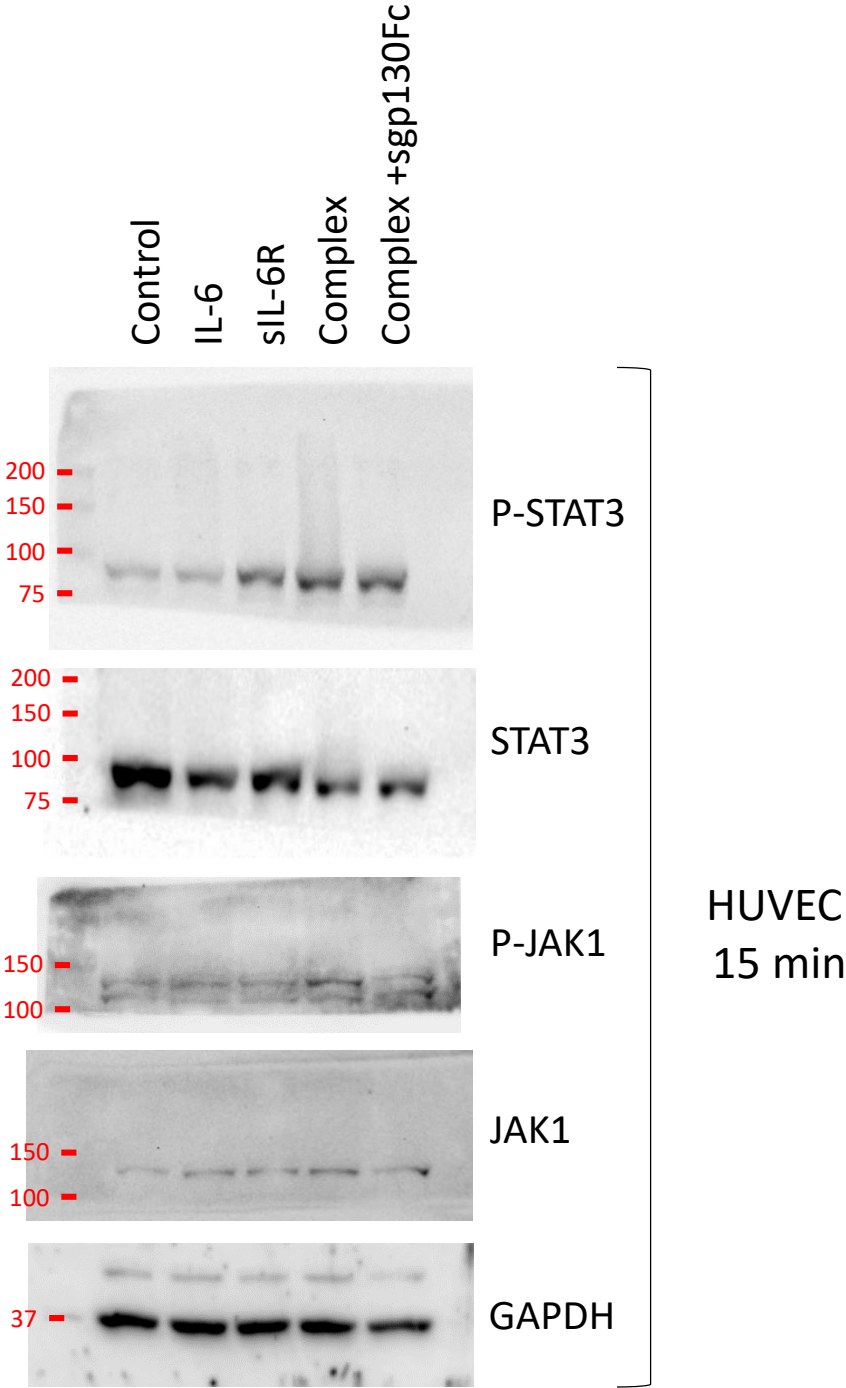

Fig. 7a

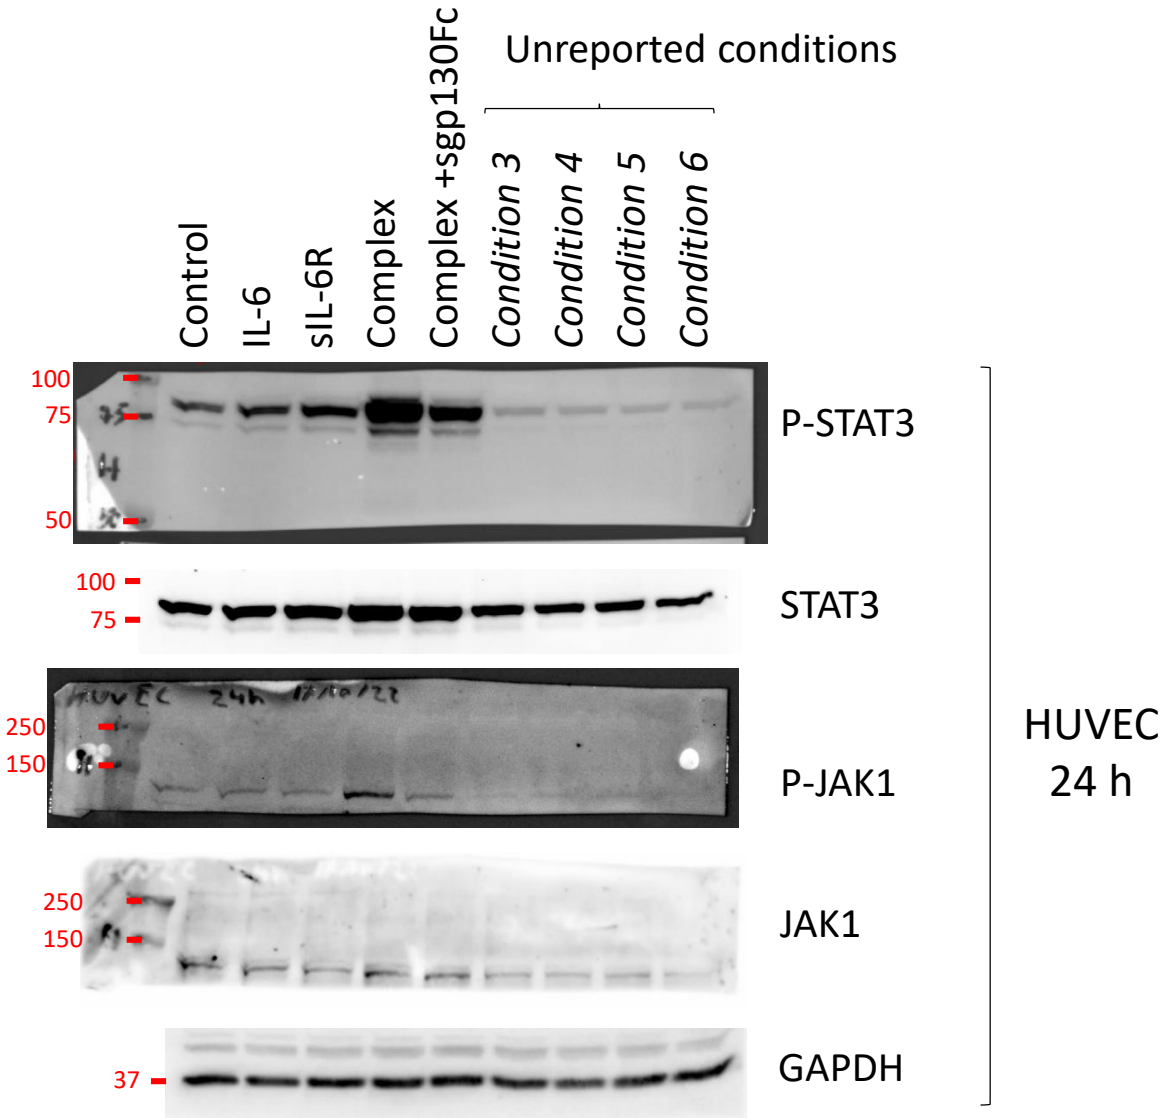

**Fig. 7a**

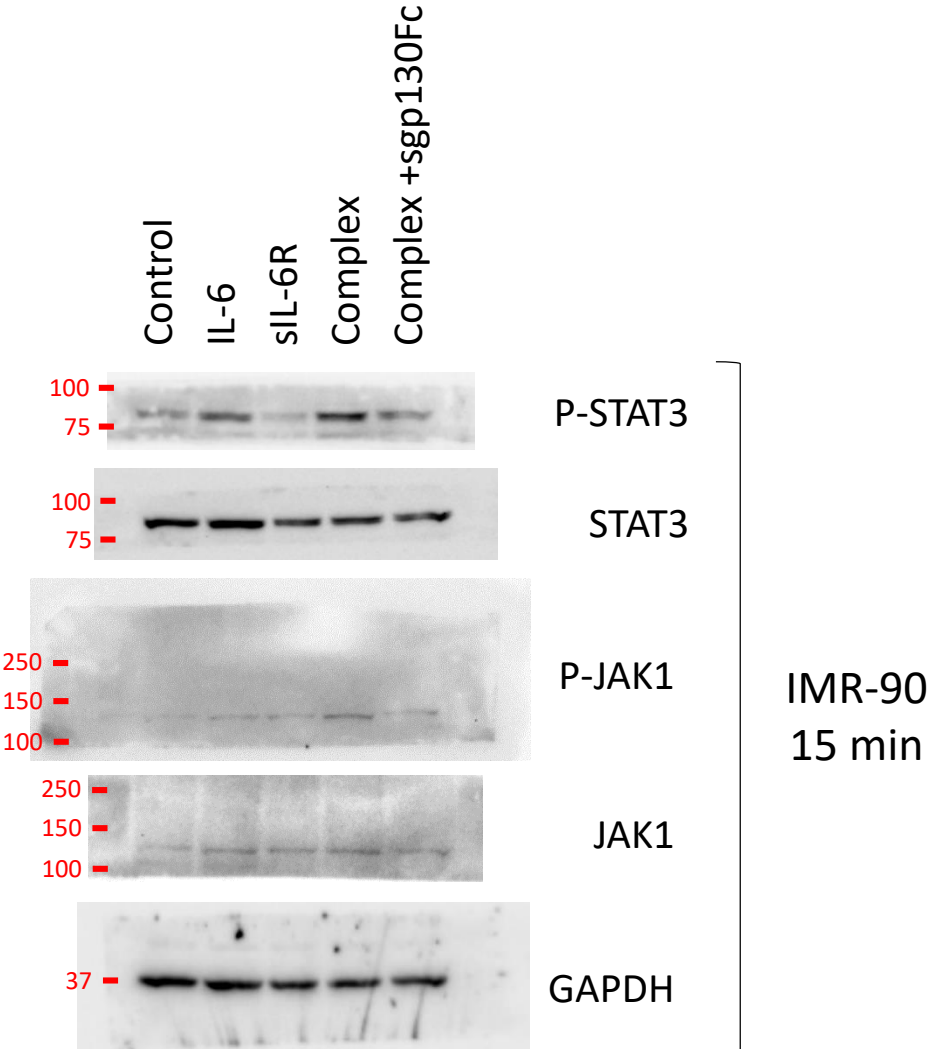

Fig. 7a

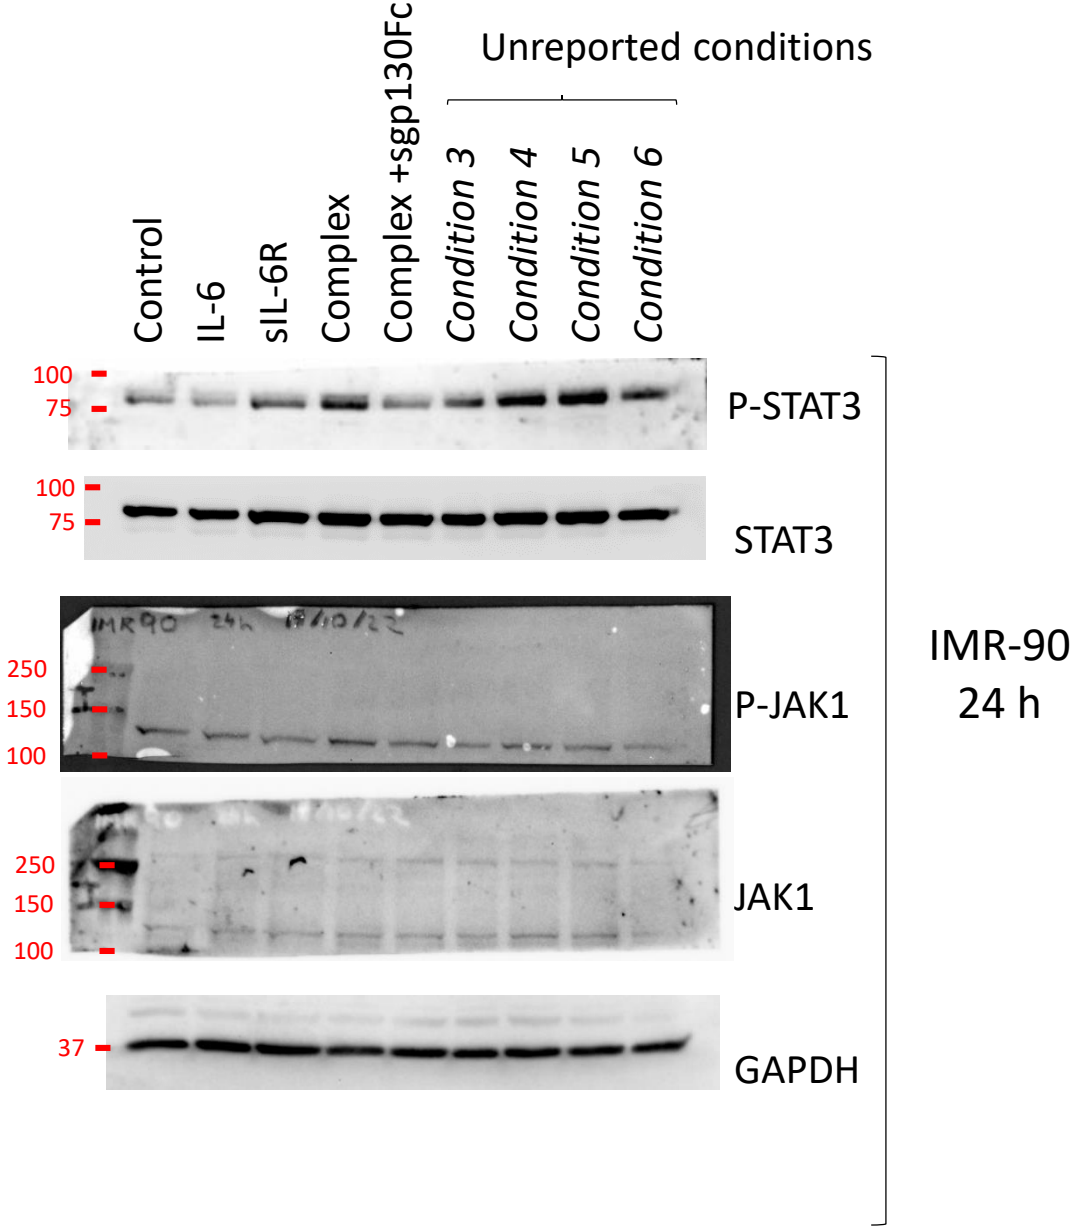

Fig. 7d

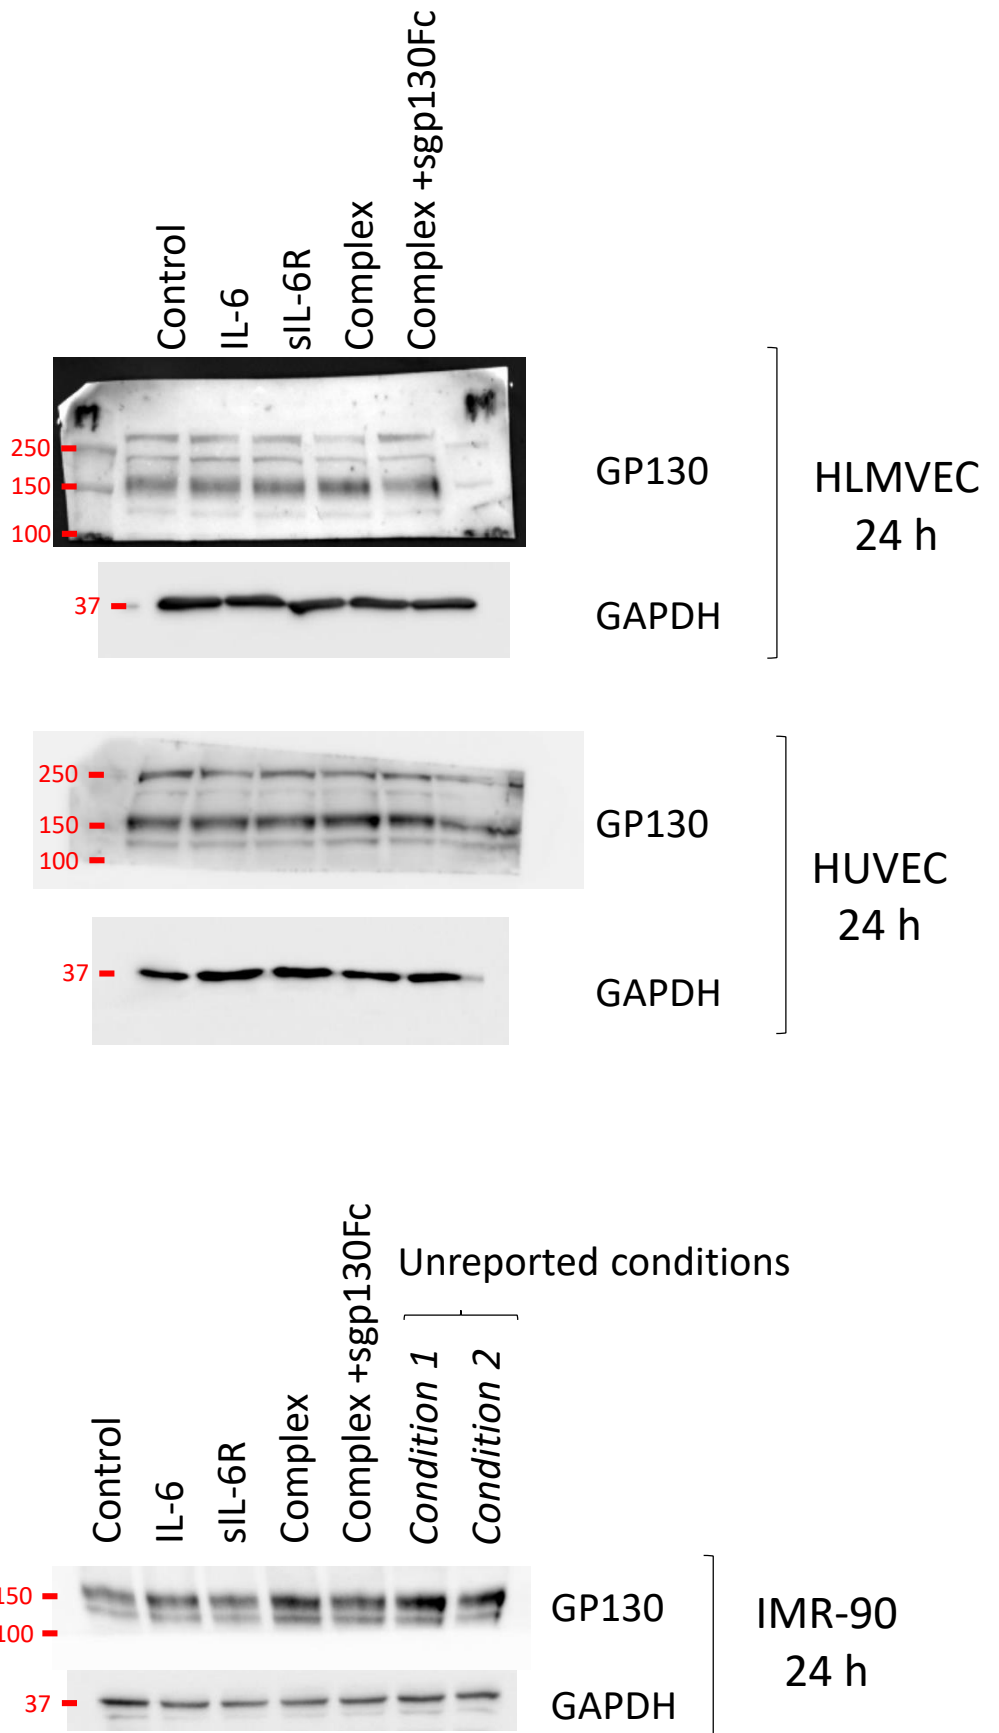





**Fig. S4**

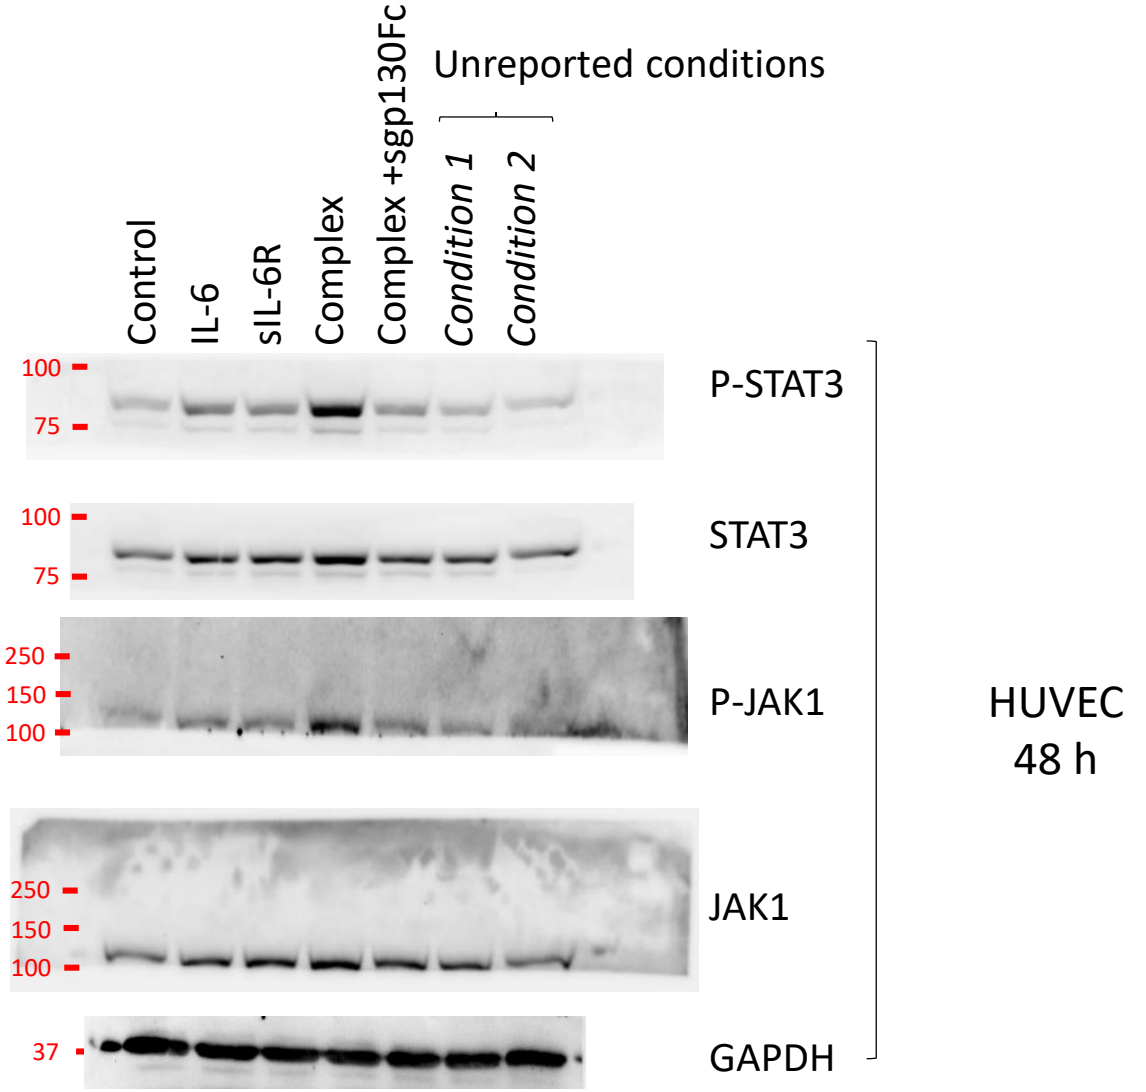

**Fig. S4**

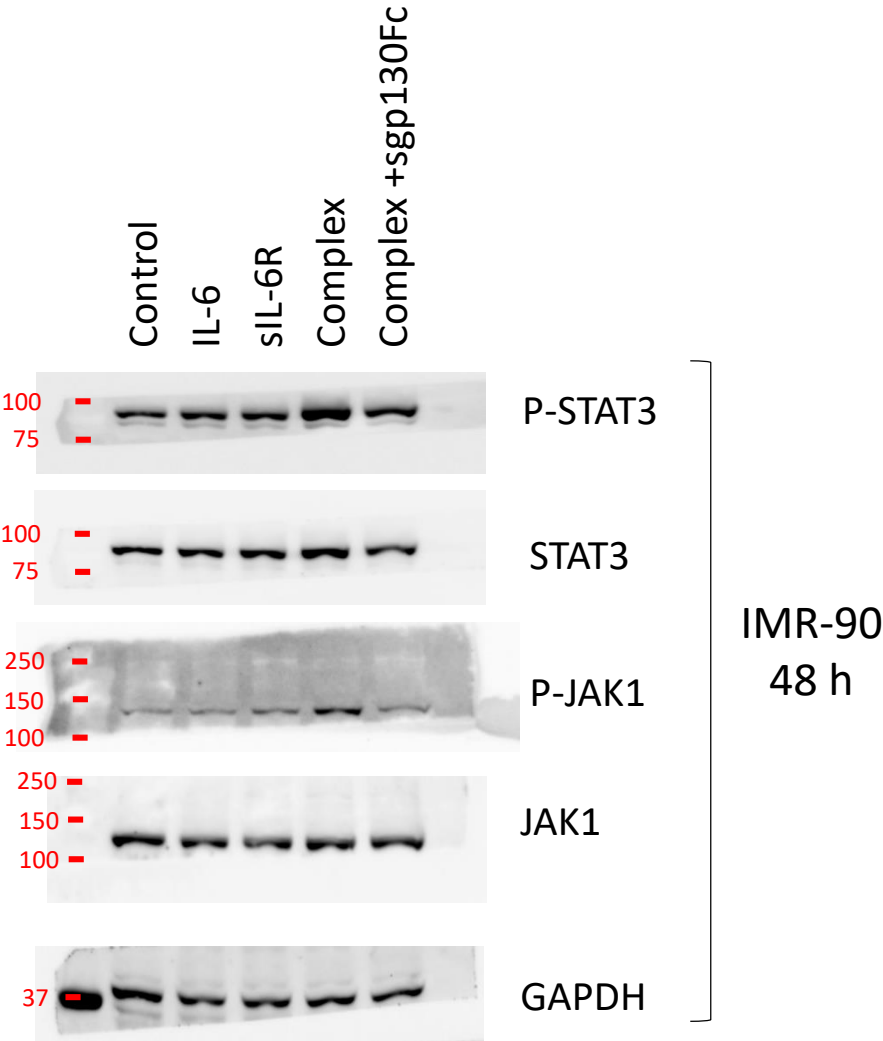



Fig. S5

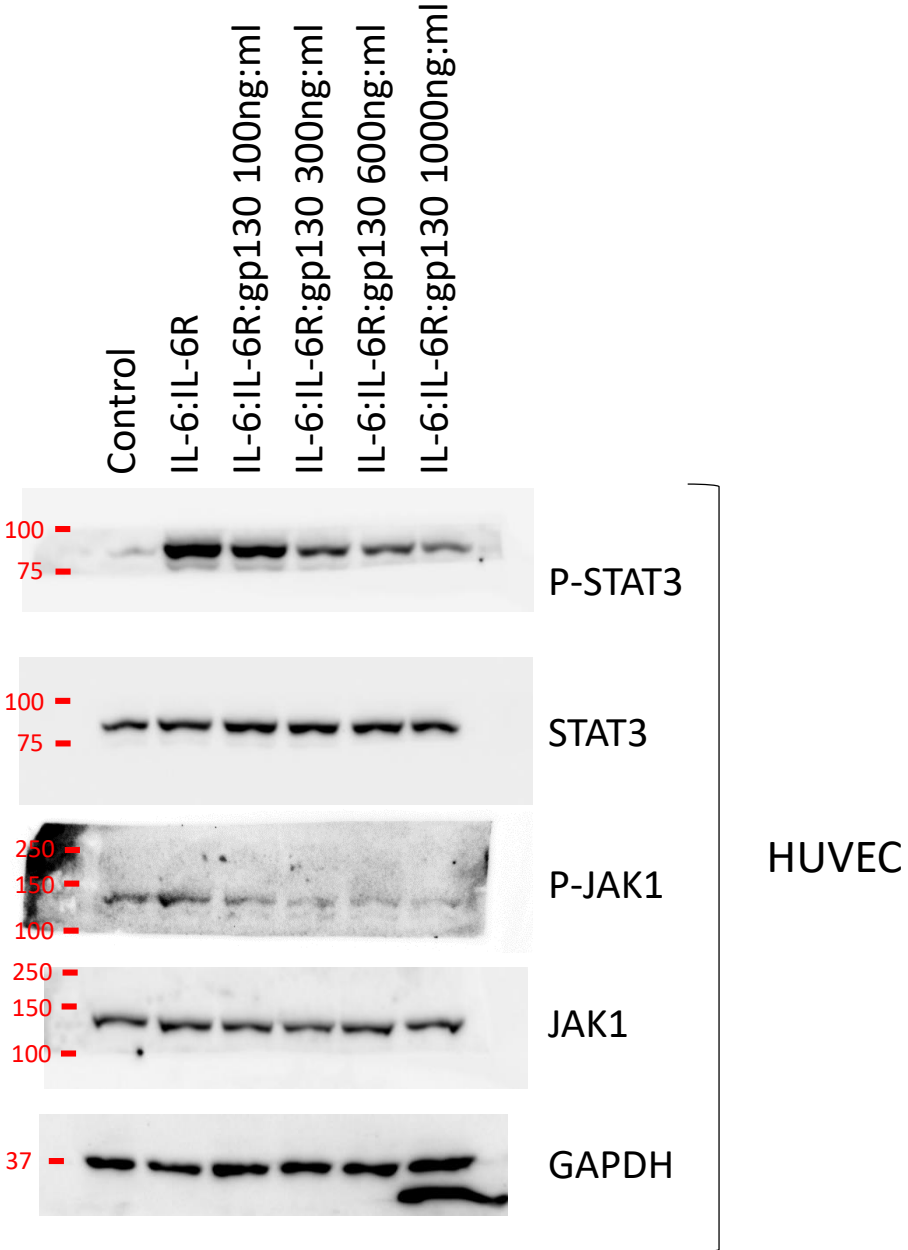

Fig. S5

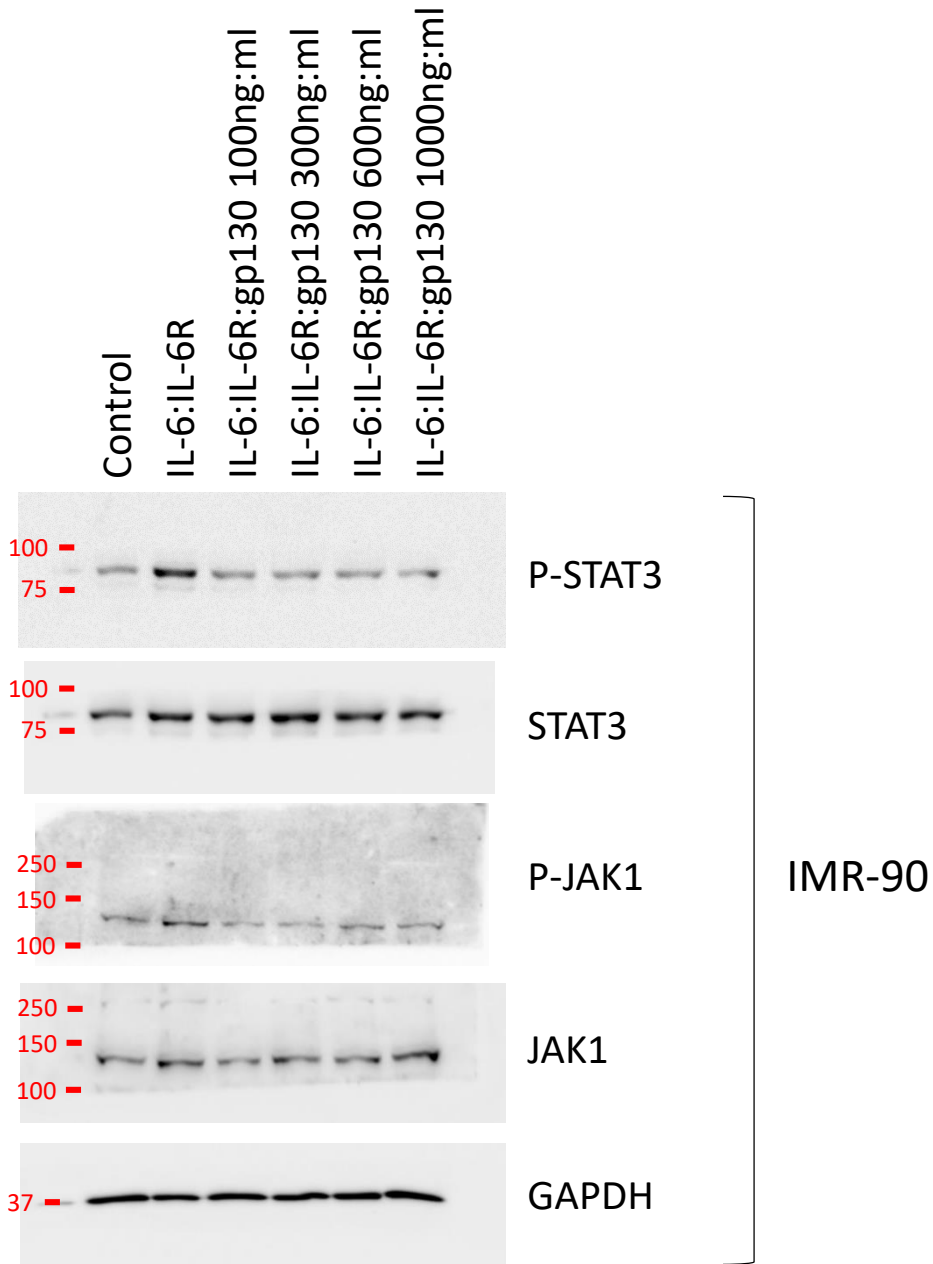

Supplement: mmc2.pdf [file mmc2.pdf]
